# Supplementary material for: Getting the most out of RNA-seq data analysis
Source: PeerJ. 2015 Oct 29;3:e1360. doi: 10.7717/peerj.1360 (PMC4631466; doi:10.7717/peerj.1360)
Supplement: Table S2 [file peerj-03-1360-s002.csv]

EnsembleID	Symbol	Chr	Start	End	EntrezID	Description	Length	GCcontent
ENSG00000006757	PNPLA4	X	7866288	7895780	8228	patatin-like phospholipase domain containing 4 [Source:HGNC Symbol;Acc:24887]	3372	0.424970344
ENSG00000022556	NLRP2	19	55476438	55512510	55655	NLR family, pyrin domain containing 2 [Source:HGNC Symbol;Acc:22948]	3744	0.526442308
ENSG00000198934	MAGEE1	X	75648046	75651744	57692	melanoma antigen family E, 1 [Source:HGNC Symbol;Acc:24934]	3699	0.542038389
ENSG00000154096	THY1	11	119288090	119295695	7070	Thy-1 cell surface antigen [Source:HGNC Symbol;Acc:11801]	3554	0.574001125
ENSG00000127152	BCL11B	14	99635624	99737861	64919	B-cell CLL/lymphoma 11B (zinc finger protein) [Source:HGNC Symbol;Acc:13222]	7603	0.496777588
ENSG00000173599	PC	11	66615704	66725847	5091	pyruvate carboxylase [Source:HGNC Symbol;Acc:8636]	4192	0.610925573
ENSG00000115884	SDC1	2	20400558	20425194	6382	syndecan 1 [Source:HGNC Symbol;Acc:10658]	3291	0.60133698
ENSG00000182013	PNMAL1	19	46969750	46974820	55228	PNMA-like 1 [Source:HGNC Symbol;Acc:25578]	3689	0.514773651
ENSG00000067177	PHKA1	X	71798664	71934167	5255	phosphorylase kinase, alpha 1 (muscle) [Source:HGNC Symbol;Acc:8925]	6173	0.455694152
ENSG00000103569	AQP9	15	58430502	58478110	366	aquaporin 9 [Source:HGNC Symbol;Acc:643]	2927	0.435257943
ENSG00000034971	MYOC	1	171604557	171621857	4653	myocilin, trabecular meshwork inducible glucocorticoid response [Source:HGNC Symbol;Acc:7610]	2083	0.51656265
ENSG00000170955	PRKCDBP	11	6340176	6341877	112464	protein kinase C, delta binding protein [Source:HGNC Symbol;Acc:9400]	1174	0.67120954
ENSG00000122641	INHBA	7	41724712	41742706	3624	inhibin, beta A [Source:HGNC Symbol;Acc:6066]	6064	0.39116095
ENSG00000176014	TUBB6	18	12308070	12326568	84617	tubulin, beta 6 [Source:HGNC Symbol;Acc:20776]	2163	0.611650485
ENSG00000198692	EIF1AY	Y	22737611	22755040	9086	eukaryotic translation initiation factor 1A, Y-linked [Source:HGNC Symbol;Acc:3252]	3148	0.339263024
ENSG00000099749	CYorf15A	Y	21729235	21752309	246126	chromosome Y open reading frame 15A [Source:HGNC Symbol;Acc:18473]	2016	0.373511905
ENSG00000129824	RPS4Y1	Y	2709527	2734997	6192	ribosomal protein S4, Y-linked 1 [Source:HGNC Symbol;Acc:10425]	998	0.44488978
ENSG00000154620	TMSB4Y	Y	15815447	15817904	9087	thymosin beta 4, Y-linked [Source:HGNC Symbol;Acc:11882]	1669	0.461953265
ENSG00000157828	RPS4Y2	Y	22918050	22942918	140032	ribosomal protein S4, Y-linked 2 [Source:HGNC Symbol;Acc:18501]	792	0.470959596
gene_symbol	interactor	interactor_chromosome_number
MYOC	TIMP1	X
SDC1	CASK	X
BCL11B	HDAC6	X
BCL11B	RBBP7	X
BCL11B	SUV39H1	X
AQP9	FATE1	X
NLRP2	IKBKG	X
PC	HUWE1	X
TUBB6	ARAF	X
TUBB6	IRS4	X
INHBA	IGSF1	X
THY1	UBL4A	X
PNMAL1	IKBKG	X
PRKCDBP	SSR4	X
