# Supplementary material for: Getting the most out of RNA-seq data analysis
Source: PeerJ. 2015 Oct 29;3:e1360. doi: 10.7717/peerj.1360 (PMC4631466; doi:10.7717/peerj.1360)
Supplement: Table S3 [file peerj-03-1360-s003.xlsx]

## Sheet: Sheet1
Cheung data set (mild biological effect size)
	number of replicates	GFOLD		sd_gfold	NOISeq		sd_noiseq	ASC		sd_asc	edgeR		sd_edger	DESeq		sd_deseq	DESeq2		sd_deseq2	Z-test		sd_ztest
PPV	1	1.1	±	0.607497	1	±	0.4	1.2121	±	0.69525	0.9	±	0.283533	0.571606	±	0.116337	1.3	±	1	0.265125	±	0.0388846
Ppv	3	29.6036	±	15.8244	43.4984	±	31.4934	NA		NA	1.44272	±	0.410322	0.557868	±	0.113419	1.28922	±	0.409226	0.252103	±	0.0285944
Ppv	6	36.3458	±	14.9161	86.9895	±	16.0986	NA		NA	1.88597	±	0.449792	0.616042	±	0.132652	2.02113	±	0.529247	0.269707	±	0.0299945
Ppv	10	52.5675	±	18.7861	92.1968	±	12.873	NA		NA	2.47862	±	0.462674	0.700168	±	0.128535	11.7786	±	8.39444	0.283991	±	0.0311525
Sensitivity	1	59.1	±	12.6	57.2	±	12.9	22.7504	±	9.45675	64.9	±	12.1	59	±	13.3	14.8	±	12.9	87.1	±	8.3
Sensitivity	3	32.3684	±	6.78956	25	±	11.7658	NA		NA	53.4211	±	11.9076	49.3158	±	10.5967	36.4211	±	10.1385	88.8421	±	8.1701
Sensitivity	6	35	±	7.53198	25.2632	±	2.5914	NA		NA	53.5263	±	12.9798	48.4211	±	12.54	38.5263	±	11.8725	92	±	7.60978
Sensitivity	10	37.7368	±	6.17126	26.5789	±	1.3743	NA		NA	57.1579	±	10.0926	50.1579	±	11.2573	39.9474	±	8.56519	96.2105	±	5.02268
S	1	1373.1	±	804.2	1284.3	±	544.5	470.782	±	309.179	1507.7	±	513.5	1983	±	261.7	214.7	±	150.8	6595.5	±	676.2
Length	3	28.07	±	19.819	144.23	±	377.258	NA		NA	762.37	±	303.169	1689.91	±	248.741	586.15	±	257.245	6734.98	±	584.108
Length	6	24.4	±	18.8985	6.03	±	4.12789	NA		NA	568.68	±	207.569	1488.41	±	170.478	391.16	±	201.251	6528.42	±	642.575
Length	10	16.38	±	9.43749	5.71	±	2.03154	NA		NA	457.05	±	140.2	1355.09	±	111.926	123.46	±	138.159	6500.5	±	675.515
Bottomly data set (strong biological effect size)
	number of replicates	GFOLD		sd_gfold	NOISeq		sd_noiseq	ASC		sd_asc	edgeR		sd_edger	DESeq		sd_deseq	DESeq2		sd_deseq2	Z-test		sd_ztest
PPV	1	31.2	±	25.6	50.6	±	20.3	47.1736	±	25.9374	15	±	4.7	5.3	±	1	29.6	±	28.4	5.1	±	0.9
Ppv	3	94.3315	±	6.89262	40.2388	±	13.7623	NA		NA	28.6779	±	4.108	10.9082	±	0.741213	52.5272	±	10.7973	5.90902	±	0.600745
Ppv	6	92.5487	±	3.33267	50.3928	±	8.63395	NA		NA	33.8831	±	2.96515	14.6932	±	0.542274	62.0934	±	7.73963	6.12231	±	0.428219
Sensitivity	1	22.3	±	7.9	18.6	±	3.3	3.31492	±	2.81714	52.5	±	4	23.5	±	3.3	0.2	±	0.6	78.8	±	3.7
Sensitivity	3	5.24309	±	2.08688	20.0746	±	9.93025	NA		NA	59.8066	±	5.40091	48.6989	±	4.8741	36.0359	±	5.74031	93.4972	±	2.54227
Sensitivity	6	9.37293	±	1.03752	26.1602	±	6.80194	NA		NA	79.047	±	4.64395	67.8011	±	3.46617	65.0939	±	4.46181	99.3398	±	0.543902
S	1	789	±	1053.4	165.1	±	93.8	39.3333	±	42.7245	1406.3	±	479.9	1618.6	±	97.3	2.5	±	6.8	5675.9	±	842
Length	3	20.63	±	10.9477	267.46	±	297.072	NA		NA	780.06	±	199.389	1617.79	±	145.666	270.19	±	127.67	5789.03	±	628.649
Length	6	36.71	±	4.32352	208.06	±	139.624	NA		NA	853.77	±	117.986	1670.64	±	65.5481	389.51	±	84.3523	5903.79	±	437.192
S: DEG set size
